# Supplementary material
Source: PubMed Central journal article supplement (PMC2863169)
Supplement: supp_M110.118422_jbc.M110.118422-1.pdf [file supp_M110.118422_jbc.M110.118422-1.pdf]

**SUPPLEMENTAL TABLE I. Forward and reverse primer pairs used in real-time polymerase chain reaction (RT-PCR).**

| Gene name | Primer 1 (5' → 3')        | Primer 2 (5' → 3')         |
|-----------|---------------------------|----------------------------|
| SREBP1C   | GGAGCCATGGATTGCACATT      | GGCCCGGAAGTCACTGT          |
| FAS       | GCTGCGGAAACTTCAGGAAAT     | AGAGACGTGTCACTCCTGGACTT    |
| SCD-1     | CCGGAGACCCCTTAGATCGA      | TAGCCTGTAAAAGATTTCTGCAAACC |
| ACC-1     | TGGACAGACTGATCGCAGAGAAAAG | TGGAGAGCCCCACACACA         |
| TRB3      | ACTTGGCTGTGGGATCAAG       | GACTGTGGGCCTGGGTACTA       |
| GPAT      | AGCAAGTCTGCGCTATCAT       | CTCGTGTGGGTGATTGTGAC       |
| ABC5      | TGGCCCTGCTCAGCATCT        | ATTTTTAAAGGAATGGGCATCTCTT  |
| mMTP      | CCTACCAGGCCCAACAAGAC      | CGCTCAATTTGCATGTATCC       |
| DGAT1     | GAGGCCTCTCTGCCCTATG       | GCCCTGGACAACACAGACT        |
| DGAT2     | CCGCAAAGGCTTTGTGAAG       | GGAATAAGTGGGAACCAGATCA     |
| CPT1      | CCAGGCTACAGTGGGACATT      | GAACTTGCCCATGTCCTTGT       |
| mGPAT1    | AGCAAGTCTGCGCTATCAT       | CTCGTGTGGGTGATTGTGAC       |
| HMGCS     | GCCGTGAAGTGGGTGAA         | GCATATATAGCAATGTCTCCTGCAA  |
| TGH1      | CACTCCTGCTGACTTGACCA      | CATCCCCTGTGCTGAAGAAT       |
| CGI58     | TGACAGTGTGCGGAAGAAG       | AGATCTGGTCGCTCAGGAAA       |
| TGH2      | GACGGGCTCTCTGCATAC        | ACCTCCTGCTGACTCTCAA        |
| ATGL      | ACAGTGTCCCCATTCTCAGG      | TTGGTTCAGTAGGCCATTCC       |
| CD68      | CTCCACAGGCAGCAGAG         | AATGATGAGAGGCAGCAAGAGG     |
| IL6       | CCACGGCCTTCCCTACTTC       | TCCACGATTCCCAGAGAACA       |
| ADRP      | CAGTGGAGTAGATAATGCCATCAC  | GCTTCTGAACCATATCAAATCCTT   |
| FGFR4     | GGGGAGCAGCAATGTTGTAT      | CAAAACAGGGCCAGAGAGAG       |
| FGF21     | CTGGGGTCTACCAAGCATA       | CACCCAGGATTTGAATGACC       |
| CIDE-B    | GTGGACAGTGAGGACTTCTTCCAG  | AGGCTGCCAAAGAGGTCTCG       |
| CYP3A11B  | AAACTGCAGGATGAGATCGATGA   | TCCAGGTATTCCATCTCCATCAC    |
| SHP       | CAGCGCTGCCTGGAGTCT        | AGGATCGTGCCTTCAGGTA        |
| LIPIN1    | CCCATTCTCATAGTCAA         | CACTAGTGGCTCCTCCTTGC       |
| ACAT2     | GACTTGGTGCAATGGACTCG      | GGTCTTGCTGTAGAATCTGG       |
